# Supplementary material for: Deep clustering in subglacial radar reflectance reveals subglacial lakes
Source: Copernicus journal article supplement (doi:10.5194/tc-18-1241-2024), 2024-03-19
Supplement: Supplementary file 1 [file tc-18-1241-2024-supplement.pdf]

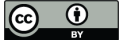

*Supplement of*

## **Deep clustering in subglacial radar reflectance reveals subglacial lakes**

**Sheng Dong et al.**

*Correspondence to:* Lei Fu ([fulei@cug.edu.cn](mailto:fulei@cug.edu.cn)) and Xueyuan Tang ([tangxueyuan@pric.org.cn](mailto:tangxueyuan@pric.org.cn))

The copyright of individual parts of the supplement might differ from the article licence.

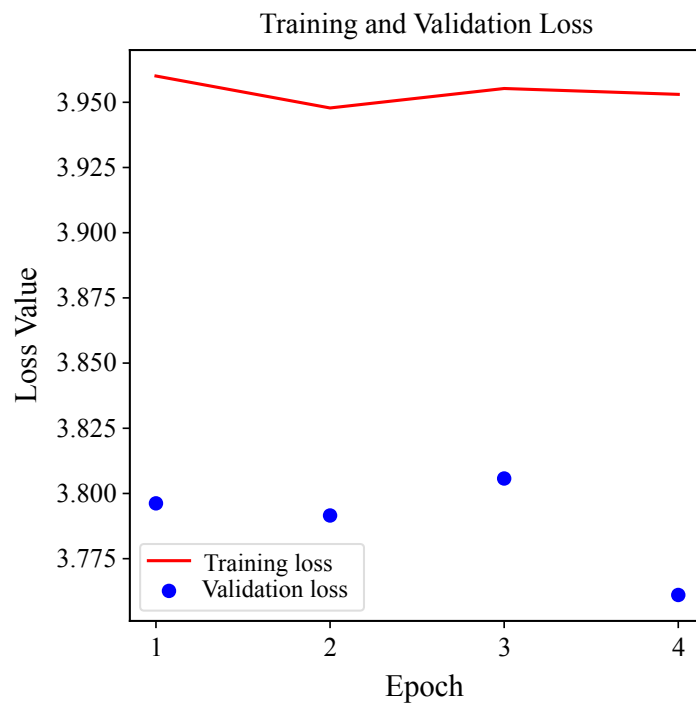

**Figure S1.** The loss changes curves in the training and validation datasets by epochs for VAE.

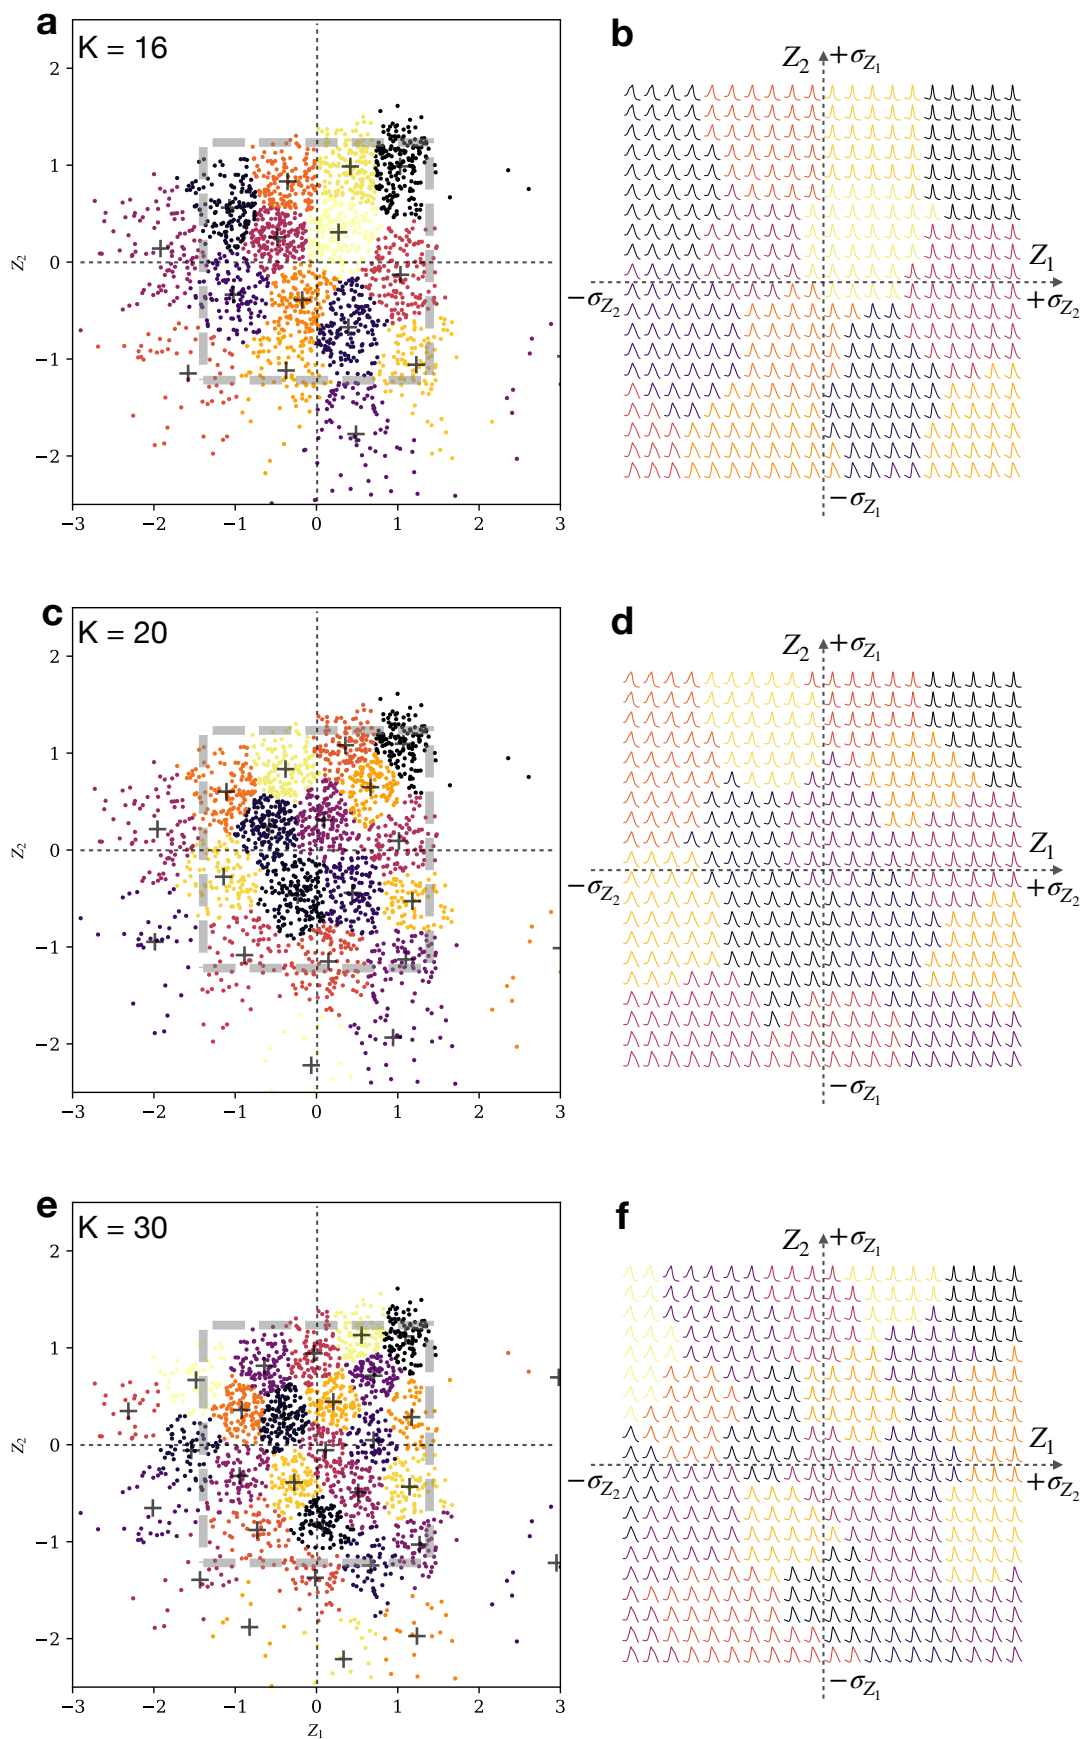

**Figure S2.** Latent space distributions of various classes of encoded reflector samples and synthetic ice bottom reflectors from virtual vectors when different values of  $K$  are applied in latent space clustering (when  $K$  is smaller than 15). The markers, legends, and labels in each line remain consistent with Figure 3. (a-b)  $K = 8$ ; (c-d)  $K = 11$ ; (e-f)  $K = 14$ .

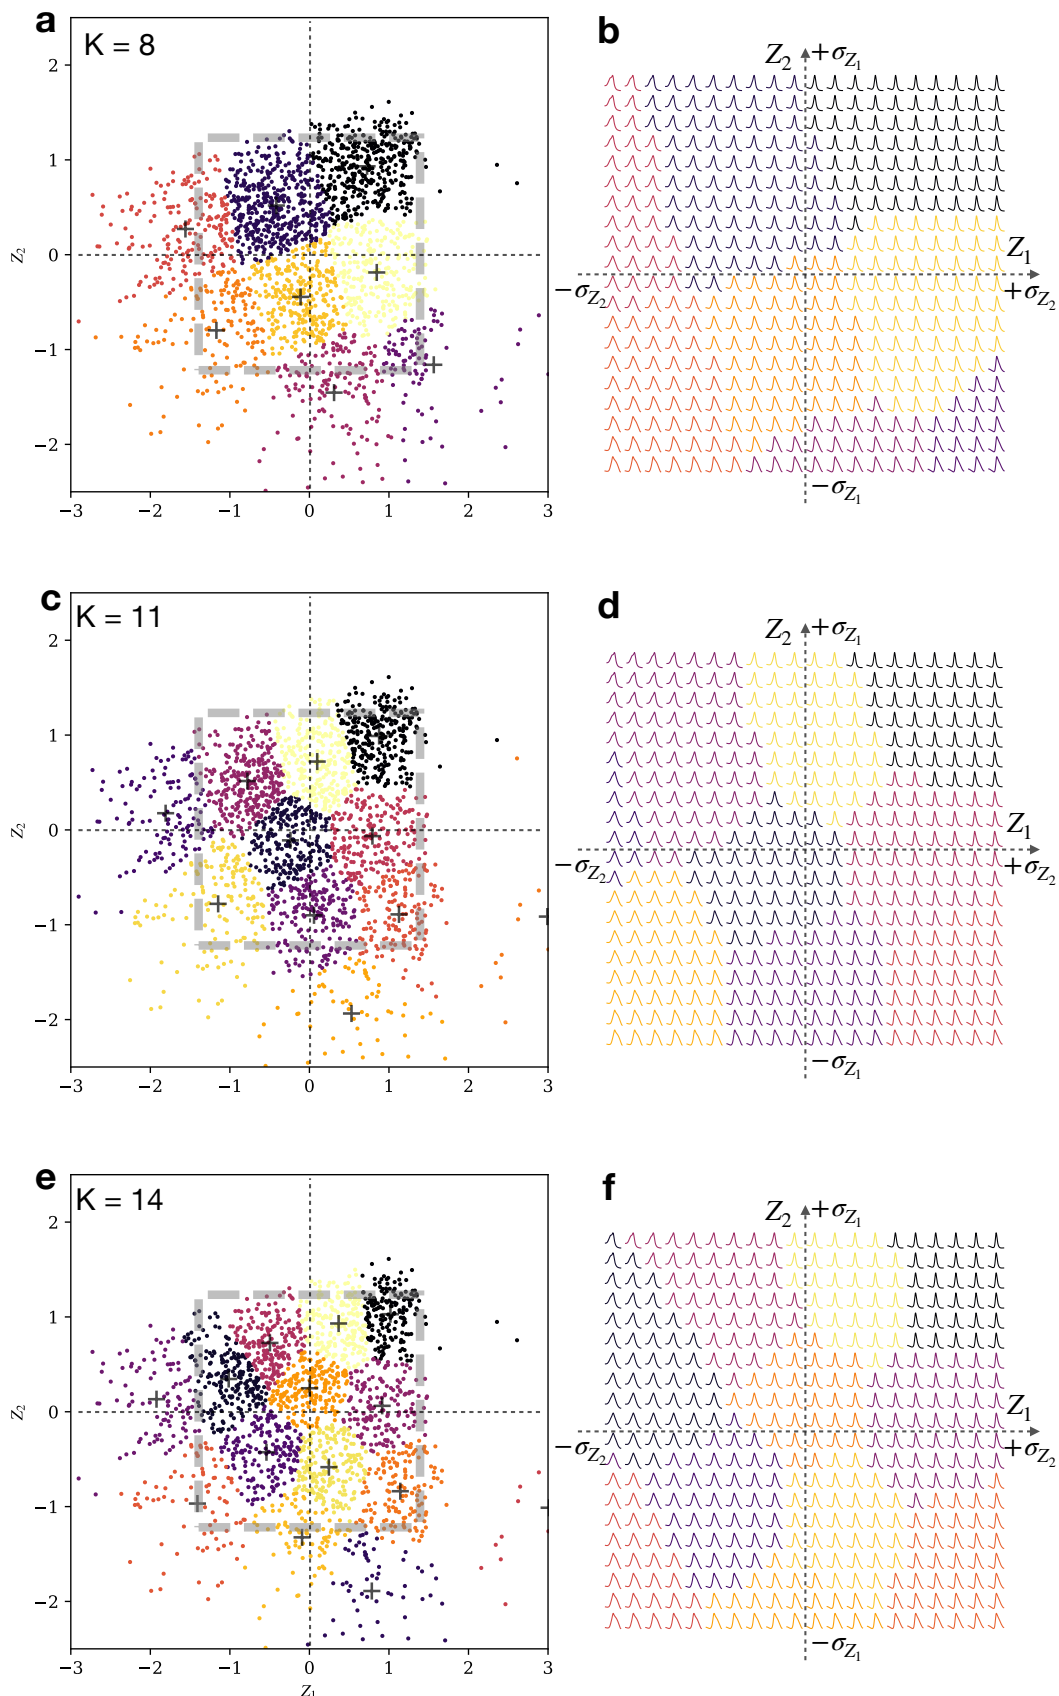

**Figure S3.** Latent space distributions of various classes of encoded reflector samples and synthetic ice bottom reflectors from virtual vectors when different values of  $K$  are applied in latent space clustering (when  $K$  is larger than 15). The markers, legends, and labels in each line remain consistent with Figure 3. (a-b)  $K = 16$ ; (c-d)  $K = 20$ ; (e-f)  $K = 30$ .

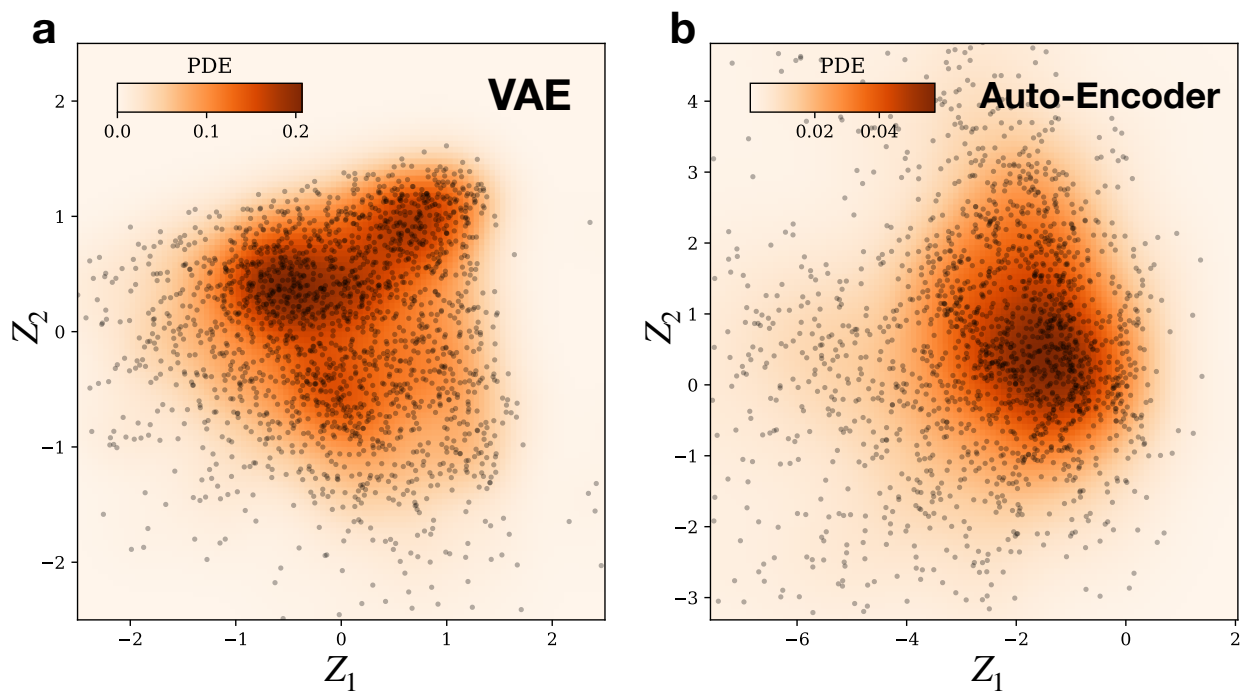

**Figure S4.** Sample distributions and the corresponding 2-D probability density estimations (PDEs) in Latent Spaces of VAE (a) and Auto-Encoder without variational layers (b).
